# Supplementary material for: Microbial diversity patterns in the root zone of two Meconopsis plants on the Qinghai-Tibet Plateau
Source: PeerJ journal article supplement (doi:10.7717/peerj.15361), 2023-05-24

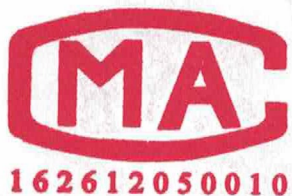

正本

# 检测报告

项目名称: 6个土壤样品理化性质的测定

检测类型: 土壤

委托单位: 西藏大学理学院

委托单位地址: /

编制人: 张月

审核人: 梁琛

批准人: [Signature]

签发日期: 2021年05月20日

西藏博源环境检测有限公司

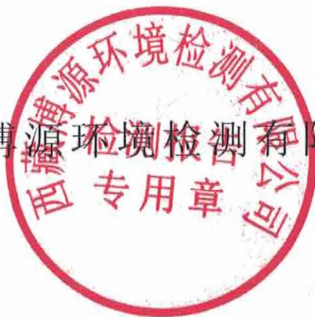

## 检测报告说明及声明

- 一、报告无“检测报告专用章”、“正本”章和骑缝章无效。
- 二、报告内容涂改增删无效；无编制、审核和批准人签字无效。
- 三、委托单位对本检测报告如有异议，请于收到报告之日(以邮戳为准或签收日)起七天内向本公司提出，逾期不予受理。无法保存、复现的样品，不受理申诉。
- 四、系委托方自行送检的样品，本公司只对当次样品检测数据负责，不对其来源负责；系受委托方委托，由检测方负责采样分析的样品，仅对当次检测有效。
- 五、未经本公司书面批准，不得复制（全文复制除外）检测报告。
- 六、未经本公司书面批准，本报告及数据不得用于商业宣传及其它非研究类用途，违者必究。
- 七、无资质认定（CMA）标志的报告和报告中表明不在资质认定（CMA）范围内的检查项目，其结果仅供委托方内部使用，不具有社会证明作用。
- 八、报告中的结果与特定的时间、特定的方法、特定的适用标准及所检样品有关，当采用不同的方法和标准对样品进行检测有可能得出不同的结果。

### 本公司通讯资料

联系电话：0891 6143625

传 真：0891 6143625

E-mail: tibetbeyondtesting@163.com

邮政编码：850000

地 址：拉萨市城关区蔡公堂路 109 号

## 一、项目概况

受西藏大学理学院委托，西藏博源环境检测有限公司对《6 个土壤样品理化性质测定》项目进行检测，于 2021 年 04 月 28 日至 05 月 17 日进行样品分析。

## 二、检测内容

### 2.1 土壤

#### 2.1.1 样品名称

M1 (MLS-1)、M2 (MLS-2)、M3 (MLS-3)、M4 (DDC-1)、M5 (DDC-2)、M6 (DDC-3)，共 6 个样品。

#### 2.1.2 检测项目

全氮、有效磷、速效钾、有机质，共 4 个。

#### 2.1.3 样品数量

共 6 个。

## 三、样品状态

| 样品编号       | 样品类型 | 样品状态   |
|------------|------|--------|
| 210156A101 | 土壤   | 棕黄色固体。 |
| 210156B101 | 土壤   | 棕黄色固体。 |
| 210156C101 | 土壤   | 黑色固体。  |
| 210156D101 | 土壤   | 褐色固体。  |
| 210156E101 | 土壤   | 黑色固体。  |
| 210156F101 | 土壤   | 褐色固体。  |

## 四、检测人员

贾正灿、徐仁茂、拉姆曲措。

## 五、质量控制和质量保证

### 5.1 质量控制措施

按照国家环境保护总局颁布的《环境监测质量保证管理规定（暂行）》要求，对布点、采样、分析测定、数据处理全程序进行质量控制。

(1) 采样人员严格遵守采样操作规程，认真填写采样记录，按规定保存和运输样品；选择部分项目加采现场空白，每批样品按 10%加采平行样。

(2) 监测分析方法采用国家颁布的标准分析方法或推荐方法，监测人员持有上岗证，所有监测仪器、量具均经过计量部门检定合格，并在有效期内。

(3) 水样测定过程中按规定进行质控样、平行空白、平行样测定。

(4) 原始数据的填报、监测报告严格实行三级审核制度。

## 六、检测依据及使用仪器

表 6-1 土壤检测依据及使用仪器

| 序号 | 检测项目 | 检测方法及标准号                                    | 方法检出限    | 检测仪器                  | 仪器编号      |
|----|------|---------------------------------------------|----------|-----------------------|-----------|
| 1  | 全氮   | 土壤质量 全氮的测定 凯氏法<br>HJ 717-2014               | 48mg/kg  | 酸式滴定管                 | 3-DD50-01 |
| 2  | 有效磷  | 土壤 有效磷的测定<br>碳酸氢钠浸提-钼锑抗分光光度法<br>HJ 704-2014 | 0.5mg/kg | UV1800PC<br>紫外可见分光光度计 | YQ-092    |
| 3  | 速效钾  | 土壤速效钾和缓效钾含量的测定<br>NY/T 889-2004             | 5mg/kg   | AA-7020<br>原子吸收分光光度法  | YQ-001    |
| 4  | 有机质  | 土壤检测 第六部分：<br>土壤有机质的测定<br>NY/T 1121.6-2006  | 1.0g/kg  | 酸式滴定管                 | 3-DD50-01 |

## 七、检测结果

表 7-1 土壤检测结果

| 样品名称 | M1 (MLS-1)  | M2 (MLS-2)           | M3 (MLS-3) | M4 (DDC-1)           | M5 (DDC-2)           | M6 (DDC-3)           |                      |
|------|-------------|----------------------|------------|----------------------|----------------------|----------------------|----------------------|
| 接样日期 | 2021.04.28  | 2021.04.28           | 2021.04.28 | 2021.04.28           | 2021.04.28           | 2021.04.28           |                      |
| 样品编号 | 210156A101  | 210156B101           | 210156C101 | 210156D101           | 210156E101           | 210156F101           |                      |
| 序号   | 检测项目        |                      |            |                      |                      |                      |                      |
| 1    | 全氮 (mg/kg)  | 2.43×10 <sup>3</sup> | 202        | 1.75×10 <sup>3</sup> | 2.88×10 <sup>3</sup> | 3.37×10 <sup>3</sup> | 3.46×10 <sup>3</sup> |
| 2    | 有效磷(mg/kg)  | 9.6                  | 1.1        | 1.3                  | 1.5                  | 1.4                  | 4.6                  |
| 3    | 速效钾 (mg/kg) | 18                   | 16         | 14                   | 14                   | 2                    | 14                   |
| 4    | 有机质 (g/kg)  | 42.5                 | 37.6       | 112                  | 66.2                 | 43.7                 | 72.6                 |

备注: 该批次样品为委托方送样, 本公司只对样品检测结果负责, 不对其来源负责。

——以下无检测数据——

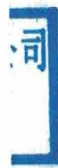

Supplement: Original_Soil_Element_Test_Report.pdf [file Original_Soil_Element_Test_Report.pdf]
