# Supplementary material for: Microbial diversity patterns in the root zone of two Meconopsis plants on the Qinghai-Tibet Plateau
Source: PeerJ journal article supplement (doi:10.7717/peerj.15361), 2023-05-24
Supplement: Soil_Elemental_Testing_Instructions.pdf [file Soil_Elemental_Testing_Instructions.pdf]

Dear Academic Editor,

We commissioned a third party testing company to determine the soil elements. The original monitoring report is in the attached.

**Table 1 Soil testing basis and use of instruments**

| Test items            | Detection method and standard number                                       | Method Detection Limit,MDL | Testing instruments                            | Instrument number |
|-----------------------|----------------------------------------------------------------------------|----------------------------|------------------------------------------------|-------------------|
| Total nitrogen        | the modified Kjeldahl Method (Chinese standard method HJ717-2014)          | 48mg/kg                    | Acid burette                                   | 3-DD50-01         |
| Available phosphorous | the ascorbic acid colorimetric method (Chinese standard method HJ704-2014) | 0.5mg/kg                   | Ultraviolet-visible Spectrophotometer UV1800PC | YQ-092            |
| Available K           | method NY/T889-2004                                                        | 5mg/kg                     | AA-7020 Atomic Absorption Spectroscopy         | YQ-001            |
| Organic matter        | NY/T1121.6-2006 method                                                     | 1.0g/kg                    | Acid burette                                   | 3-DD50-01         |
| pH                    | pH metre                                                                   | -                          | pH metre                                       | Sartorius PB-10   |
| Soil moisture         | drying method                                                              | -                          | drying oven                                    | -                 |

**Table 2 Summary of the soil properties of each sample**

| Site/P value | Sample                 | soil moisture (%) | Organic matter/ (mg/kg) | Available K/ (mg/kg) | Available P/ (mg/kg) | Total nitrogen /(mg/kg) | pH   |
|--------------|------------------------|-------------------|-------------------------|----------------------|----------------------|-------------------------|------|
| M site       | <i>M. horridula</i>    | 13.4              | 42.5                    | 18                   | 9.6                  | 2430                    | 8.13 |
| M site       | <i>M. integrifolia</i> | 20.9              | 37.6                    | 16                   | 1.1                  | 202                     | 6.24 |
| M site       | Bulk soil              | 36.4              | 112                     | 14                   | 1.3                  | 1750                    | 7.14 |
| D site       | <i>M. horridula</i>    | 27.7              | 66.2                    | 14                   | 1.5                  | 2880                    | 6.94 |
| D site       | <i>M. integrifolia</i> | 19.4              | 43.7                    | 2                    | 1.4                  | 3370                    | 7.21 |
| D site       | Bulk soil              | 6.5               | 72.6                    | 14                   | 4.6                  | 3460                    | 7.45 |
